# Supplementary material
Source: PubMed Central journal article supplement (PMC3434530)
Supplement: supp_me.2012-1019_ME-12-1019_.pdf [file supp_me.2012-1019_ME-12-1019_.pdf]

## **Supplemental Information**

### **Overexpression of Hepatocyte Nuclear Factor- 4 $\alpha$ initiates cell cycle entry, but is not sufficient to promote $\beta$ -cell expansion in human islets**

Sebastian Rieck, Jia Zhang, Zhaoyu Li, Chengyang Liu, Ali Naji, Karen K. Takane, Nathalie M. Fiaschi-Taesch, Andrew F. Stewart, Jake A. Kushner, Klaus H. Kaestner

#### **A. Supplemental Figures and Legends:**

Supplemental Figure 1 related to Fig. 1

Supplemental Figure 2 related to Fig. 2

Supplemental Figure 3 related to Fig. 3

Supplemental Figure 4 related to Fig. 4

Supplemental Table 1 – Primary antisera employed for immunofluorescence analysis.

Supplemental Table 2 – Clinical information of human islet donations used in this study with contributions to Figures.

#### **B. Supplemental References**

**Supplemental Figure 1:**

Rieck et al. Supplemental Figure 1:

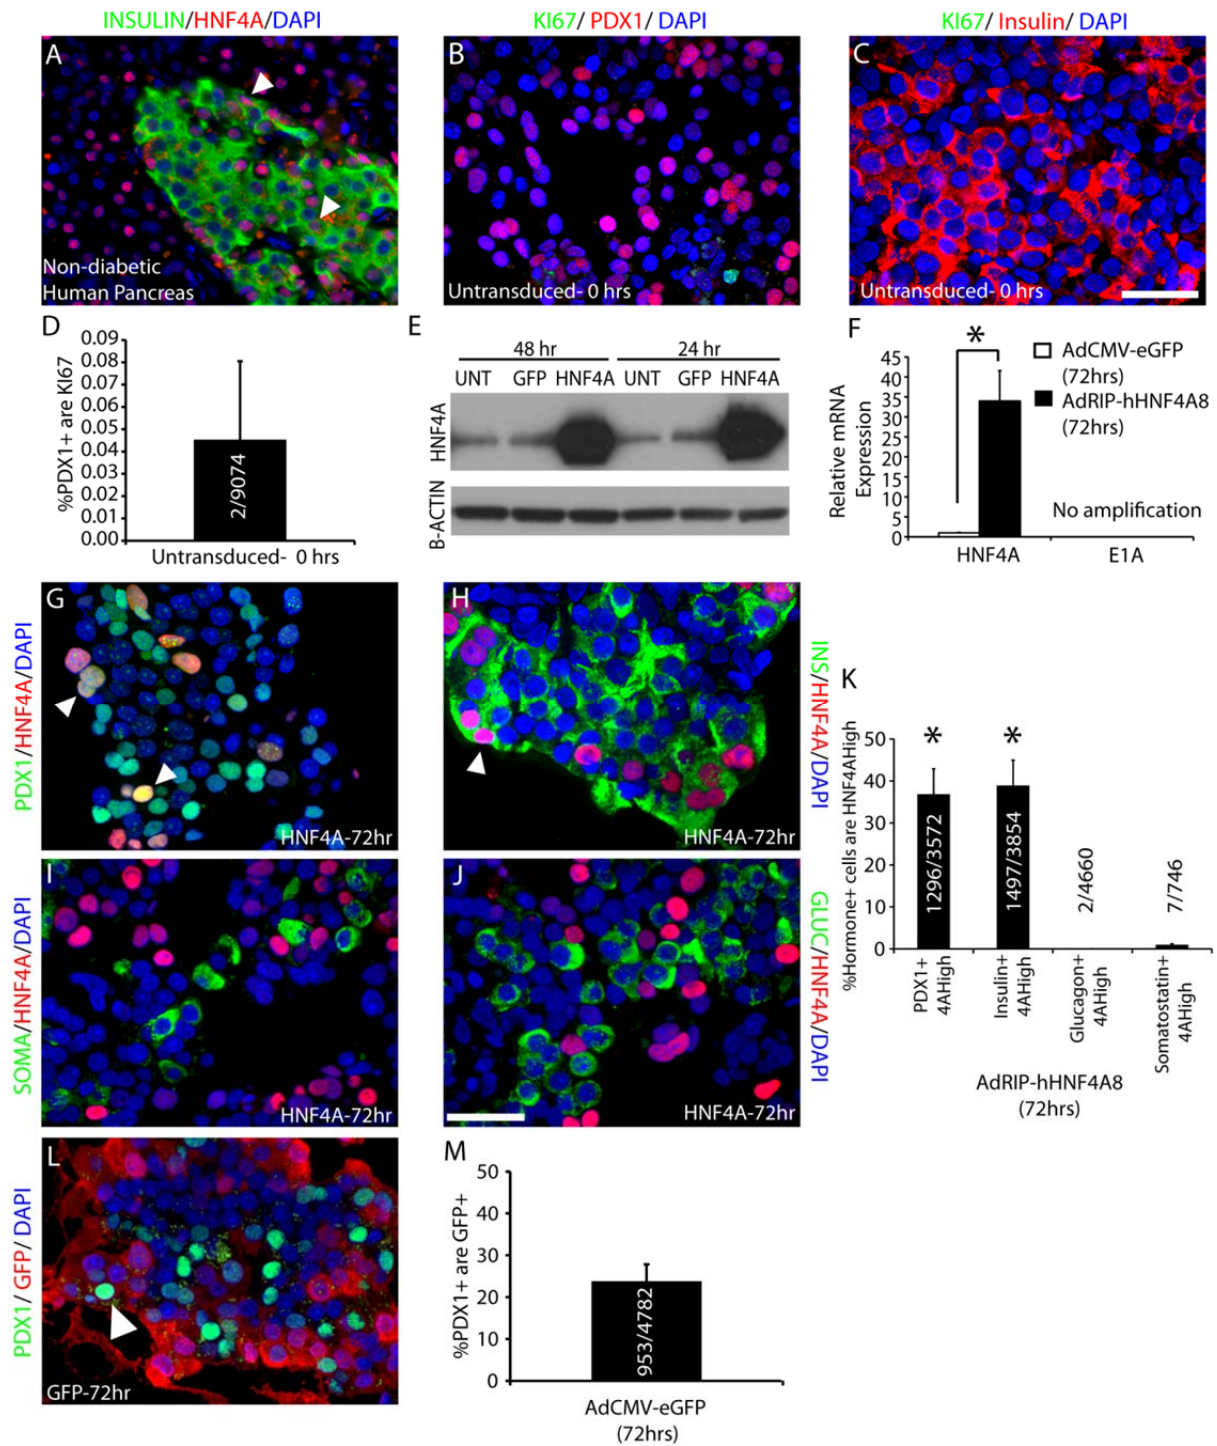

**Supplemental Figure 1: Adenoviral overexpression of HNF4 $\alpha$ 8 in human  $\beta$ -cells. (A)**

Immunostaining of non-diabetic human pancreas with Insulin (green), HNF4 $\alpha$  (red) and DAPI (blue). White arrows indicate examples of  $\beta$ -cells expressing HNF4 $\alpha$ . Immunolocalization of Ki67 (green), DAPI (blue), (B) Pdx1 (red) and (C) Insulin (red) of untransduced primary human islets before transduction (0 hours). (D) Quantification of the percentage of Pdx1<sup>+</sup> that are Ki67<sup>+</sup> (n=3). (E) Western blot analysis of HNF4 $\alpha$  expression in untransduced, eGFP-, and HNF4 $\alpha$ 8-transduced islets 24 hours and 48 hours after transduction with  $\beta$ -actin as a loading control (n=1 per time point). A replication-competent adenovirus, encoding *E1A*, can lead to misleading results when assessing  $\beta$ -cell proliferation (1). (F) Gene expression of *HNF4 $\alpha$*  and *E1A* in AdCMV-eGFP and AdRIP-hHNF4 $\alpha$ 8 treated islets (n=5-6; \*, p<0.001 versus CMV-eGFP condition). Dual immunofluorescence staining of HNF4 $\alpha$  (red) and DAPI (blue) with (G) Pdx1 (green), (H) Insulin (green), (I) Somatostatin (green) and (J) Glucagon (green) in human islets incubated for 72 hours after transduction with AdRIP-hHNF4 $\alpha$ 8. White arrows show examples of Pdx1<sup>+</sup>, HNF4 $\alpha$ <sup>High</sup> and Insulin<sup>+</sup>, HNF4 $\alpha$ <sup>High</sup> cells. (K) Quantification of the percentage of hormone-expressing cells that are HNF4 $\alpha$ <sup>High</sup> (n=3 per hormone<sup>+</sup> group; Both Pdx1<sup>+</sup>, HNF4 $\alpha$ <sup>High</sup> and Insulin<sup>+</sup>, HNF4 $\alpha$ <sup>High</sup> groups are statistically significantly higher than either Glucagon<sup>+</sup>, HNF4 $\alpha$ <sup>High</sup> and Somatostatin<sup>+</sup>, HNF4 $\alpha$ <sup>High</sup>, groups, \*, p<0.005 as determined by one-way ANOVA with Tukey *post-hoc* test). (L) Immunodetection of Pdx1 (green), GFP (red), and DAPI (blue) in eGFP-transduced islets 72 hours after transduction. The white arrow indicates an example of a Pdx1<sup>+</sup> cell expressing eGFP. (M) Quantification of the percentage of Pdx1<sup>+</sup> cells that are GFP<sup>+</sup> 72 hours after transduction (n=4), statistically similar to the transduction efficiency seen when using AdRIP-hHNF4 $\alpha$ 8. The scale bars in (C, J) indicate 25 $\mu$ m.

**Supplemental Figure 2**

Rieck et al. Supplemental Figure 2:

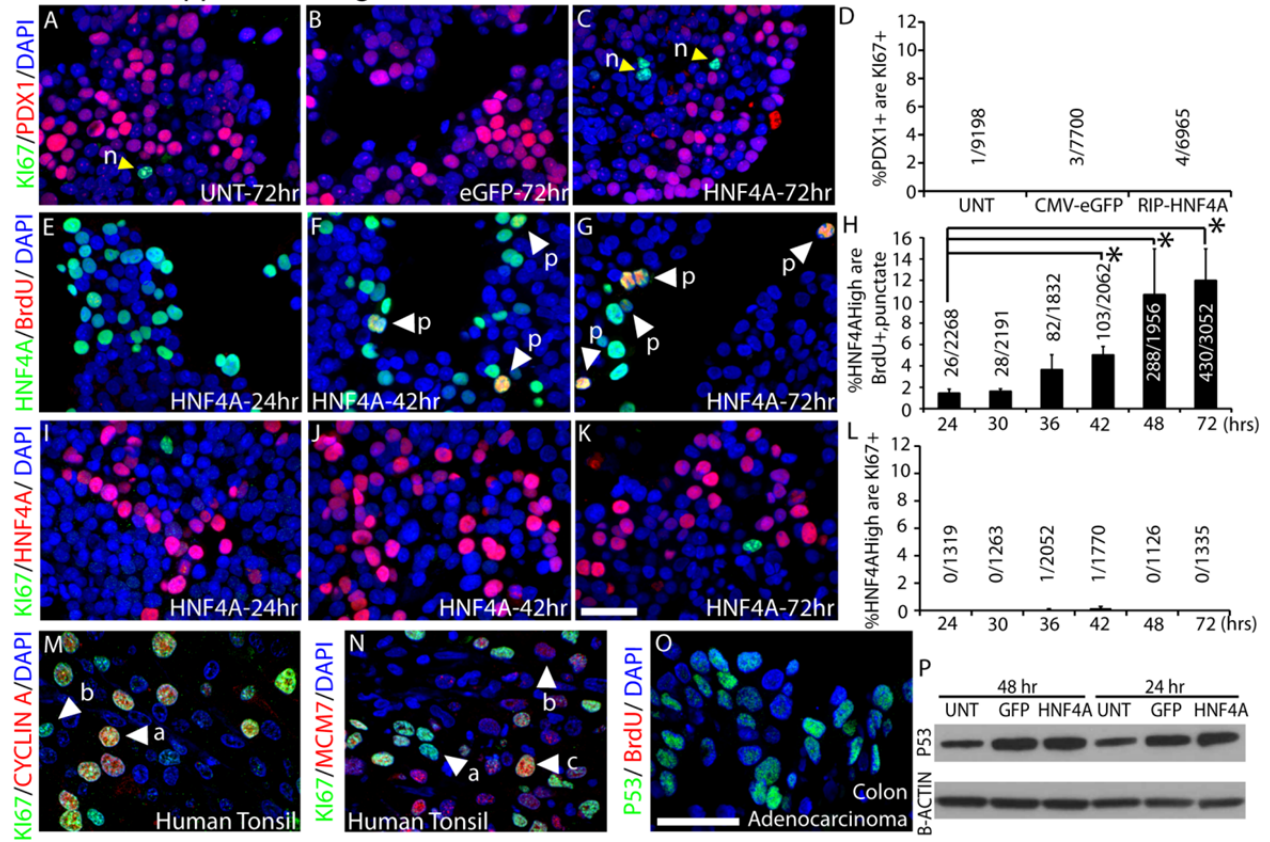

**Supplemental Figure 2: HNF4 $\alpha$ <sup>High</sup>  $\beta$ -cells do not show signs of complete cell cycle**

**progression.** Immunolocalization of Ki67 (green), Pdx1 (red) and DAPI (blue) in (A) untransduced, (B) AdCMV-eGFP, and (C) AdRIP-hHNF4 $\alpha$ 8 transduced islets 72 hours after transduction. (D) Quantification of the percentage of Pdx1<sup>+</sup> cells that are Ki67<sup>+</sup> in untransduced, eGFP-, and hHNF4 $\alpha$ 8- transduced conditions 72 hours after transduction (n=4 for each group). Immunodetection of HNF4 $\alpha$  (green), BrdU (red), and DAPI (blue) in AdRIP-hHNF4 $\alpha$ 8 transduced islets (E) 24 hours, (F) 42 hours, (G) and 72 hours after transduction. (H) Quantification of the percentage of HNF4 $\alpha$ <sup>High</sup> cells that are BrdU<sup>+,punctate</sup> at 24, 30, 36, 42, 48, and 72 hours after transduction (n=3-5 for each time point; 42, 48, and 72 hour time points are statistically significantly higher when compared to 24 hour time point individually, \*, p<0.03 as determined by one-tailed Student's *t-test*). Assessment of Ki67 (green), HNF4 $\alpha$  (red), and DAPI (blue) colocalization in primary human islets (I) 24 hours, (J) 42 hours, and (K) 72 hours after transduction with AdRIP-hHNF4 $\alpha$ 8. (L) Quantification of percentage of HNF4 $\alpha$ <sup>High</sup> cells that are Ki67<sup>+</sup> (n=3-4 per time point). Immunostaining of Ki67 (green), DAPI (blue) with (M) Cyclin A and (N) Mcm7 in human tonsil as a positive control. (O) Immunodetection of p53 (green), BrdU (red) and DAPI (blue) in human colon carcinoma (positive control tissue). (P) Western blot analysis of total p53 protein expression in untransduced, eGFP-, and HNF4 $\alpha$ 8-transduced islets 24 hours and 48 hours after transduction with  $\beta$ -actin expression as a loading control. In (M) arrow 'a' indicates Ki67<sup>+</sup>, Cyclin A<sup>+</sup> cell and arrow 'b' Ki67<sup>+</sup>, Cyclin A<sup>-</sup> cell. In (N) arrow 'a' indicates Ki67<sup>+</sup>, Mcm7<sup>-</sup> cell, arrow 'b' Ki67<sup>-</sup>, Mcm7<sup>+</sup> cell, and arrow 'c' a Ki67<sup>+</sup>, Mcm7<sup>+</sup> cell. The scale bar in (K, and O) indicates 25  $\mu$ m.

**Supplemental Figure 3:**

Rieck et al. Supplemental Figure 3:

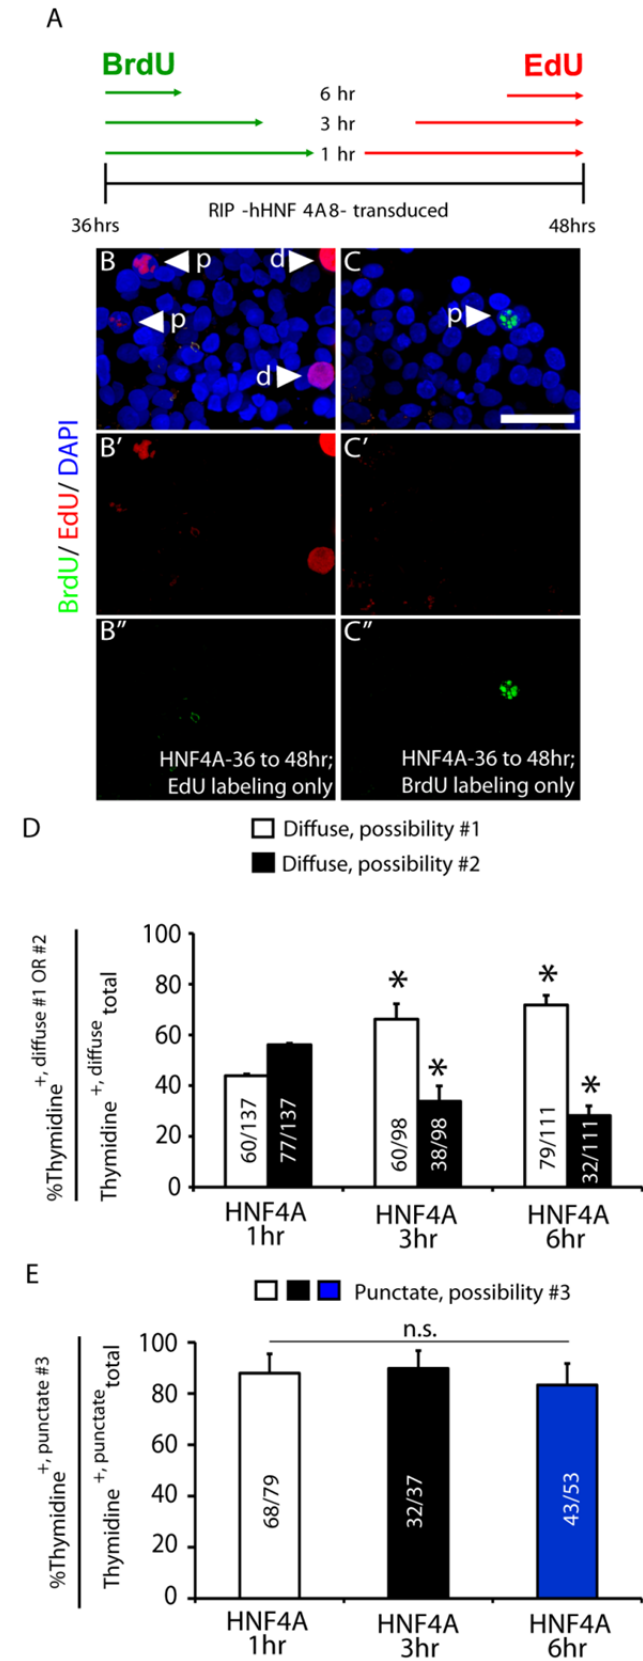

**Supplemental Figure 3: Overexpression of HNF4 $\alpha$ 8 leads to activation of the DNA damage response associated with replication stress.** (A) Schematic of the experimental protocol used in this study to assess repeated licensing of DNA replication at one origin. Immunodetection of BrdU (green), EdU (red), and DAPI (blue) in HNF4 $\alpha$ 8-transduced primary human islets exposed to (B) EdU-only, and (C) BrdU-only continuously from 36 to 48 hours after transduction. Individual red channel (B'-C') and green channel (B''-C'') are shown. (D) Quantification of the percentage of either thymidine<sup>+,diffuse #1</sup> or thymidine<sup>+,diffuse #2</sup> over total thymidine<sup>+,diffuse</sup> cells in HNF4 $\alpha$ 8 transduced islets dual labeled with one hour, three hour, and six hour non-labeling times (n=3 per time point and BrdU incorporation pattern; both 3hr<sup>Diffuse,#1</sup>, 6hr<sup>Diffuse,#1</sup> and 3hr<sup>Diffuse#2</sup>, 6hr<sup>Diffuse#2</sup> are statistically significantly different than either 1hr<sup>Diffuse#1</sup>, 1hr<sup>Diffuse#2</sup>, respectively, \*, p<0.03 as determined by one-tailed ANOVA with Tukey *post-hoc* test). (E) Quantification of the percentage of thymidine<sup>+,punctate #3</sup> over total thymidine<sup>+,punctate</sup> cells in HNF4 $\alpha$ 8 transduced islets dual labeled with one hour, three hour, and six hour non-labeling times (n=3 per time point; each time point is statistically similar as determined by one-way ANOVA with Tukey *post-hoc* test). The scale bars in (C) indicates 25  $\mu$ m.

Supplemental Figure 4:

Rieck et al. Supplemental Figure 4:

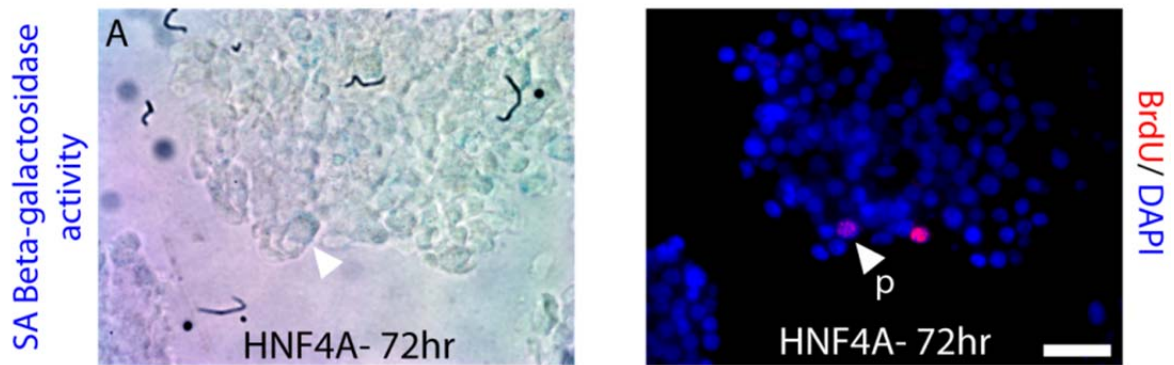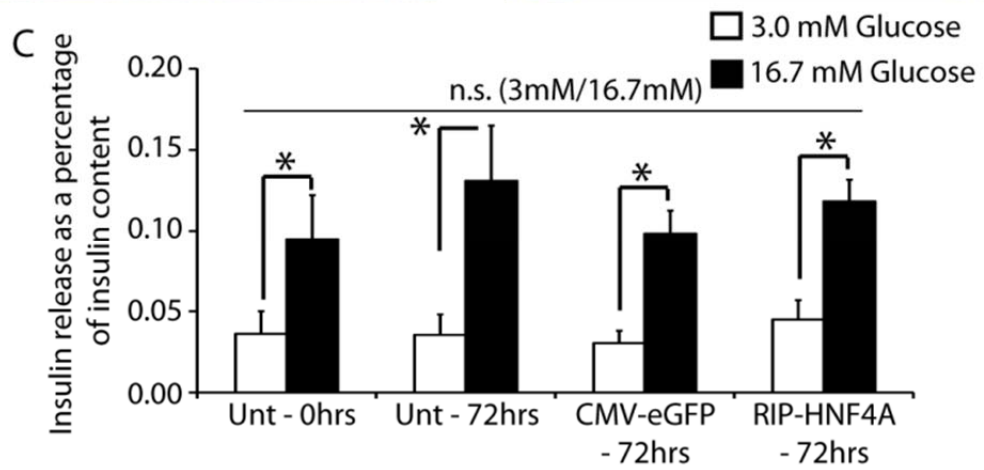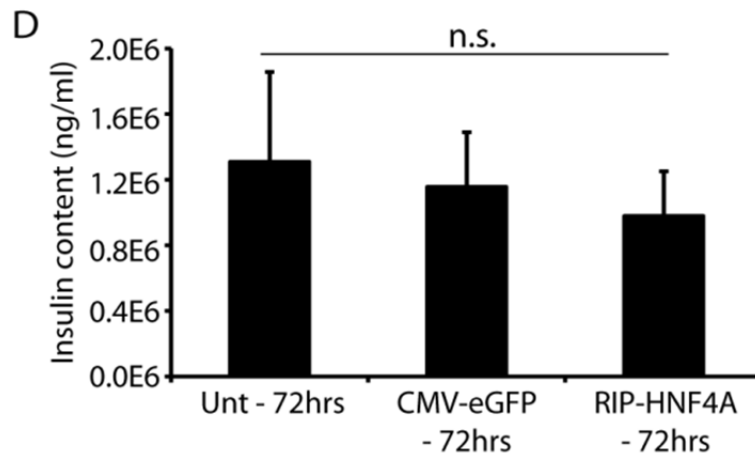



**Supplemental Figure 4: Analysis of senescence and  $\beta$ -cell function in human islets**

**transduced with RIP-hHNF4 $\alpha$ 8.** (A left) Brightfield image of AdRIP-hHNF4 $\alpha$ 8 transduced islets stained for SA  $\beta$ -galactosidase activity, and (A right) BrdU (red) and DAPI (blue). (B) Static glucose-stimulated insulin secretion assay (GSIS) of untransduced, eGFP-, and HNF4 $\alpha$ 8-overexpressing primary human islets 72 hours after transduction treated with 3mM and 16.7mM glucose. GSIS was also performed on untransduced primary human islets upon receipt (0 hours) (n=3-6; each glucose stimulation statistically significantly increases insulin secretion individually, \*, p<0.05, as determined by one-tailed Student's *t*-test; All 3mM and 16.7mM groups are not statistically different as by one-way ANOVA with Tukey *post-hoc* test). (D) Insulin content measurements for untransduced, eGFP-, hHNF4 $\alpha$ 8- overexpressing islets 72 hours after transduction (n=3-5 per group; each group is time is statistically similar as determined by one-way ANOVA with Tukey *post-hoc* test). The white arrow in (A right) indicates a BrdU<sup>+,punctate</sup> cell that is positive for SA  $\beta$ -galactosidase activity. The scale bars in (A right) indicate 25  $\mu$ m.

| <b>Supplemental Table 1<br/>Primary Antisera Employed for<br/>Immunofluorescence Analysis</b> |                |                        |                            |                               |
|-----------------------------------------------------------------------------------------------|----------------|------------------------|----------------------------|-------------------------------|
| <b>Protein/Antibody</b>                                                                       | <b>Species</b> | <b>Company</b>         | <b>Category<br/>Number</b> | <b>Dilution</b>               |
| <b>Pdx1</b>                                                                                   | guinea pig     | Dr. Christopher Wright | (Gift)                     | 1 to 1000                     |
| <b>Insulin</b>                                                                                | guinea pig     | Millipore              | 4010-01L                   | 1 to 250                      |
| <b>HNF4alpha</b>                                                                              | mouse          | R and D Systems        | PP-H1415-00                | 1 to 500                      |
| <b>HNF4alpha</b>                                                                              | rabbit         | Santa Cruz             | 8987                       | 1 to 500                      |
| <b>BrdU</b>                                                                                   | rat            | Accurate Chemical      | OBT0030G                   | 1 to 1000                     |
| <b>Glucagon</b>                                                                               | rabbit         | Invitrogen             | 13091                      | 1 to 200                      |
| <b>Somatostatin</b>                                                                           | rabbit         | Invitrogen             | 13099                      | 1 to 200                      |
| <b>Ki67</b>                                                                                   | rabbit         | Leica/Novacastra       | NCL-Ki67p                  | 1 to 500                      |
| <b>Cyclin A</b>                                                                               | mouse          | Thermo Scientific      | ms-1061                    | 1 to 200                      |
| <b>Mcm7</b>                                                                                   | mouse          | Thermo Scientific      | ms-862                     | 1 to 200                      |
| <b>gamma H2AX (Ser 139)</b>                                                                   | rabbit         | Cell Signaling         | 2577                       | 1 to 250                      |
| <b>p53</b>                                                                                    | mouse          | Santa Cruz             | 126                        | 1 to 200                      |
| <b>phospho-Chk2 (Thr 68)</b>                                                                  | rabbit         | Cell Signaling         | 2661                       | 1 to 200                      |
| <b>phospho-p53 (Ser 15)</b>                                                                   | rabbit         | Cell Signaling         | 9284                       | 1 to 200                      |
| <b>GFP</b>                                                                                    | goat           | Abcam                  | 6673                       | 1 to 250                      |
| <b>p16</b>                                                                                    | mouse          | Santa Cruz             | 1661                       | 1 to 250                      |
| <b>Nkx6.1</b>                                                                                 | rabbit         | BCBC                   | AB1069                     | 1 to 4000 (TSA Amplification) |
| <b>MafA</b>                                                                                   | rabbit         | Bethyl Laboratories    | A300-611A                  | 1 to 2000 (TSA Amplification) |

| <b>Supplementary Table 2: Clinical Information of Human Islet Donations used in this study</b> |                  |                  |                     |                        |                                                                                  |
|------------------------------------------------------------------------------------------------|------------------|------------------|---------------------|------------------------|----------------------------------------------------------------------------------|
| <b>Islet Preparation</b>                                                                       | <b>Donor Age</b> | <b>Donor BMI</b> | <b>Islet Purity</b> | <b>Islet Viability</b> | <b>Used for following data (Figure #):</b>                                       |
| Non-diabetic 1                                                                                 | 49               | 24.5             | 85                  | 94                     | 1J, S1F, S2D, 3D, 4D, S4A, S4D                                                   |
| Non-diabetic 2                                                                                 | 40               | 24.4             | 85                  | 87                     | 1J, 1O, 1P, S1M, S2D, S2H, S2L, 3D, 3I, 3J, 4G, 4J, S4A, S4D                     |
| Non-diabetic 3                                                                                 | 48               | 25.6             | 80                  | 89                     | 1J, 1K, 1O, 1P, S1K, S1M, 2D, 2R, S2D, S2H, 3D, 3I, 4D, 4G, 4J                   |
| Non-diabetic 4                                                                                 | 36               | 20.5             | 70                  | 94                     | 1J, 1O, 1P, S1K, S1M, S2D, S2H, S2L, 3D, 4D, 4J                                  |
| Non-diabetic 5                                                                                 | 36               | 31.6             | 90                  | 83                     | S1D, S2H, 2D, S4A                                                                |
| Non-diabetic 6                                                                                 | 47               | 22.8             | 90                  | 95                     | S1D, S1E, S2H, S2P, 2D, S4A                                                      |
| Non-diabetic 7                                                                                 | 36               | 38.7             | 80                  | 96                     | S1E, S2H, S2P, S2L, 2D, 2O, 2R, 4M, 4P                                           |
| Non-diabetic 8                                                                                 | 56               | 25.1             | 85                  | 90                     | 1O, 1P, S1K, S2D, S2H, S2L, 2D, 2G, 2J, 2O, 2R, 3D, 3I, 3J, 4J, 4M, 4P, S4A, S4D |
| Non-diabetic 9                                                                                 | 54               | 27.8             | 85                  | 98                     | S1K, S2D, S2L, 3I, 4D, 4G, S4A, S4D                                              |
| Non-diabetic 10                                                                                | 36               | 40.8             | 95                  | 90                     | S1D, S4A                                                                         |
| Non-diabetic 11                                                                                | 31               | 28.7             | 90                  | 90                     | 1J, 1K, S1K, S2H, 2D, 2O, 2R                                                     |
| Non-diabetic 12                                                                                | 58               | 26.8             | 85                  | 96                     | 1K, S1M, 2D, 2R, S2H, S2L, 3I, 3J, 4D, 4G, 4J, 4M                                |
| Non-diabetic 13                                                                                | 61               | 22.9             | 88                  | 95                     | S2H, S2L, 2D, 2G, 2J, 3I, 3J, 4G, 4J, 4M, 4P                                     |
| Non-diabetic 14                                                                                | 28               | 29.2             | 80                  | 83                     | 1K, S1K, 2D, 2R, 3J, 4D, 4J                                                      |
| Non-diabetic 15                                                                                | 53               | 29.2             | 80                  | 94                     | 3I, 3J, 4G, 4J, S4A, 5C                                                          |
| Non-diabetic 16                                                                                | 22               | 22.4             | 85                  | 90                     | 2G, 2J                                                                           |
| Non-diabetic 17                                                                                | 50               | 32.9             | 85                  | 96                     | S2D, S3D, S3E, 5C                                                                |
| Non-diabetic 18                                                                                | 42               | 32.0             | 90                  | 92                     | 5C, 5F, 5G, 5J, 5K, 6C, 6F, 6G, 6I                                               |
| Non-diabetic 19                                                                                | 40               | Unavailable      | 95                  | 95                     | 2O, S3D, S3E, 5C, 5F, 5G, 5J, 5K, 6C, 6F, 6G, 6I                                 |
| Non-diabetic 20                                                                                | 28               | 36.3             | 90                  | 86                     | S3D, S3E, 4M, 5C, 5F, 5G, 5J, 5K, 6C, 6F, 6G, 6I                                 |
| Non-diabetic 21                                                                                | 57               | 24.2             | 85                  | 95                     | 5C, 6C, 6F, 6G, 6I                                                               |
| Non-diabetic 22                                                                                | 38               | 27.8             | 90                  | 95                     | S1F, S4A, S4D                                                                    |
| Non-diabetic 23                                                                                | 40               | 37               | 95                  | 95                     | S1F, 4M, 4P                                                                      |
| Non-diabetic 24                                                                                | 20               | 35.2             | 85                  | 94                     | S1F                                                                              |
| Non-diabetic 25                                                                                | 51               | 23.5             | 90                  | 89                     | S1F                                                                              |
| Non-diabetic 26                                                                                | 26               | Unavailable      | Unavailable         | Unavailable            | S1A (No report of diabetes history)                                              |
| Non-diabetic 27                                                                                | 40               | 28.4             | 95                  | 94                     | S4A                                                                              |
| Type 2 Diabetic 1                                                                              | 47               | 27.5             | 90                  | 96                     | 1P (2 year history of diabetes; HbA1c = 7.4%)                                    |
| Type 2 Diabetic 2                                                                              | 52               | 29.2             | 80                  | 80                     | 1P (HbA1c = 6.3%)                                                                |
| Type 2 Diabetic 3                                                                              | 58               | 66.4             | 75                  | 91                     | 1P (15-20 year history of diabetes)                                              |

**Supplemental References:**

- 1. Lavine JA, Raess PW, Davis DB, Rabaglia ME, Presley BK, Keller MP, Beinfeld MC, Kopin AS, Newgard CB, & Attie AD (2010) *Mol Endocrinol* 24, 464-467.**
